# Supplementary material
Source: PubMed Central journal article supplement (PMC5289845)
Supplement: 691FigureS2.pdf [file 691FigureS2.pdf]

### Fis1p tail anchor sequence

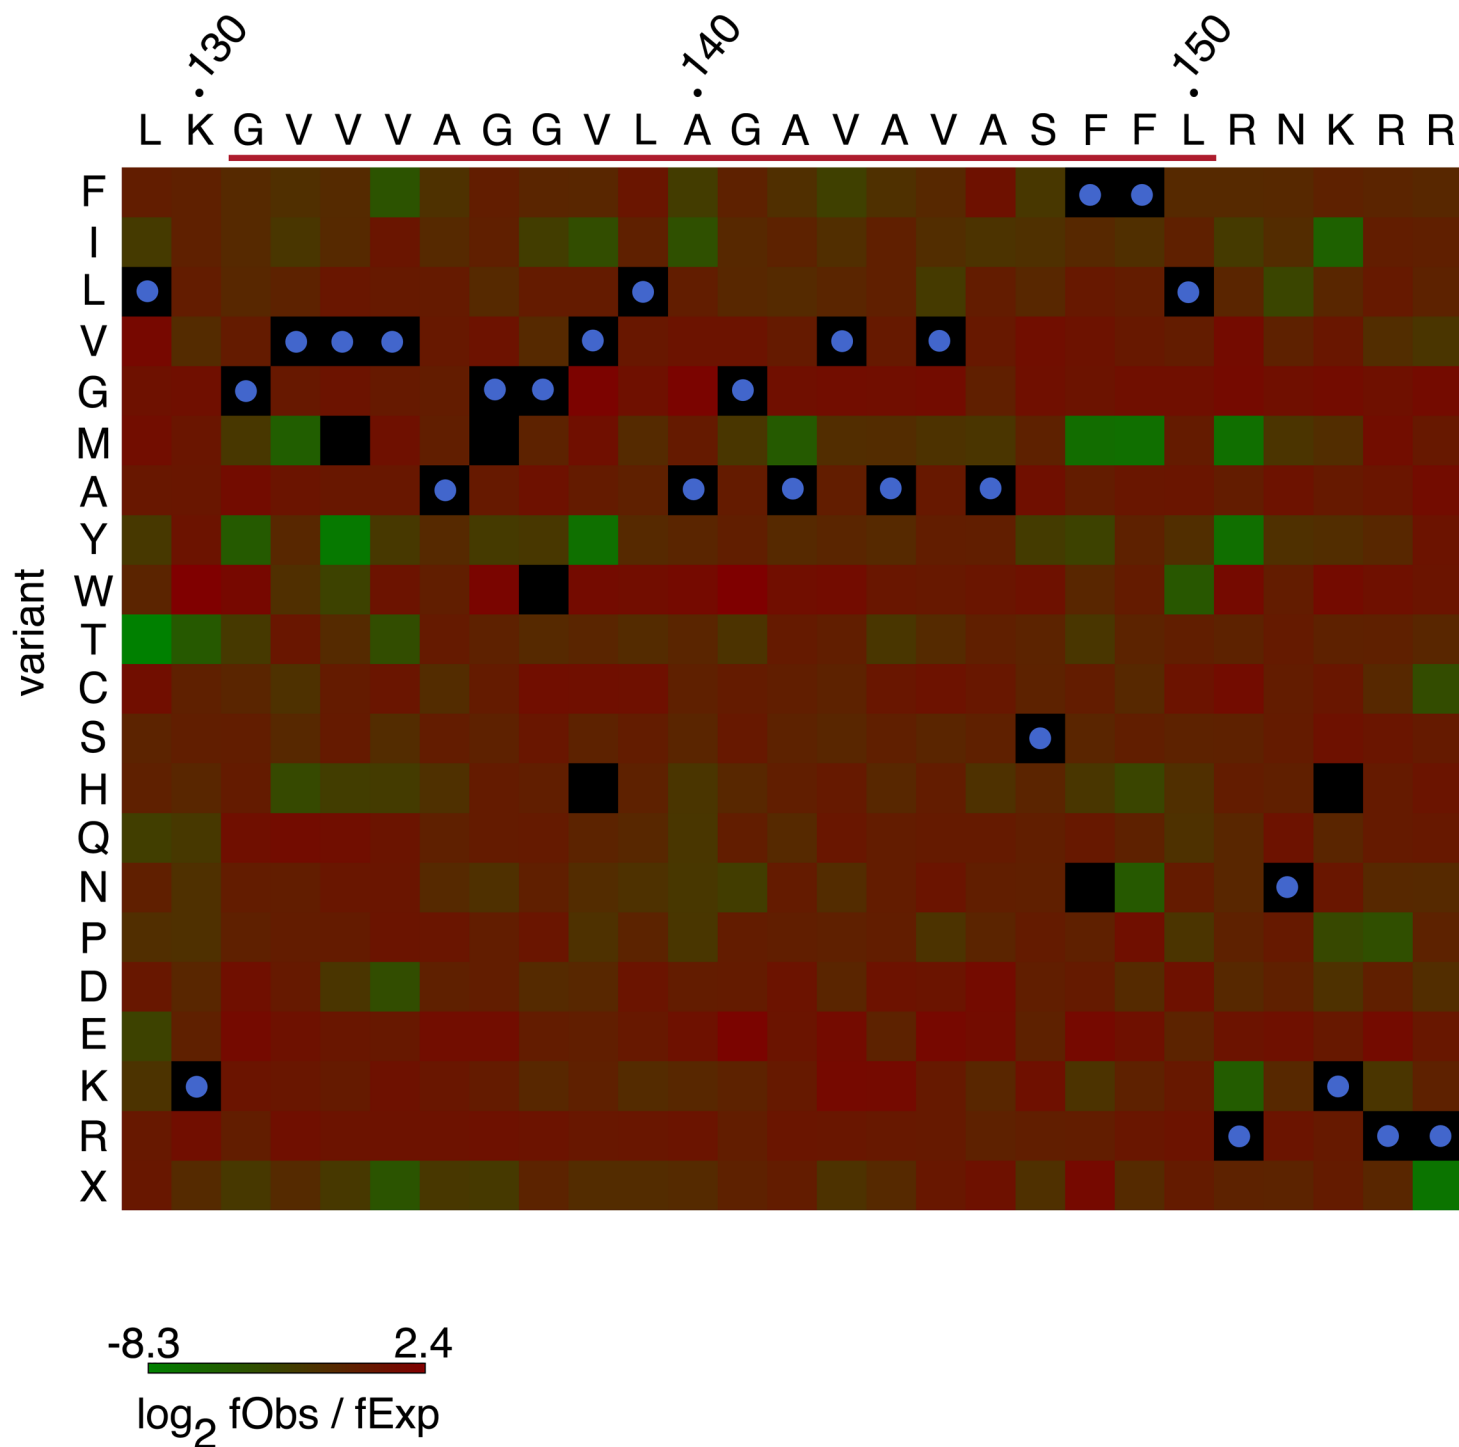

**Figure S2.** Amino acid replacement representation within the Gal4-sfGFP-Fis1p TA library. The fraction of counts representing each amino acid replacement in the starting SC-Trp library ( $f_{\text{Obs}}$ ) was compared to the fraction that would be expected based on randomized codon recovery ( $f_{\text{Exp}}$ ). Native amino acids are represented by a black square with a blue dot. Amino acid replacements with no representation in the library are represented by empty black squares. The predicted MAD is indicated by a red line.
