# Supplementary material
Source: PubMed Central journal article supplement (PMC5289845)
Supplement: 691FigureS3.pdf [file 691FigureS3.pdf]

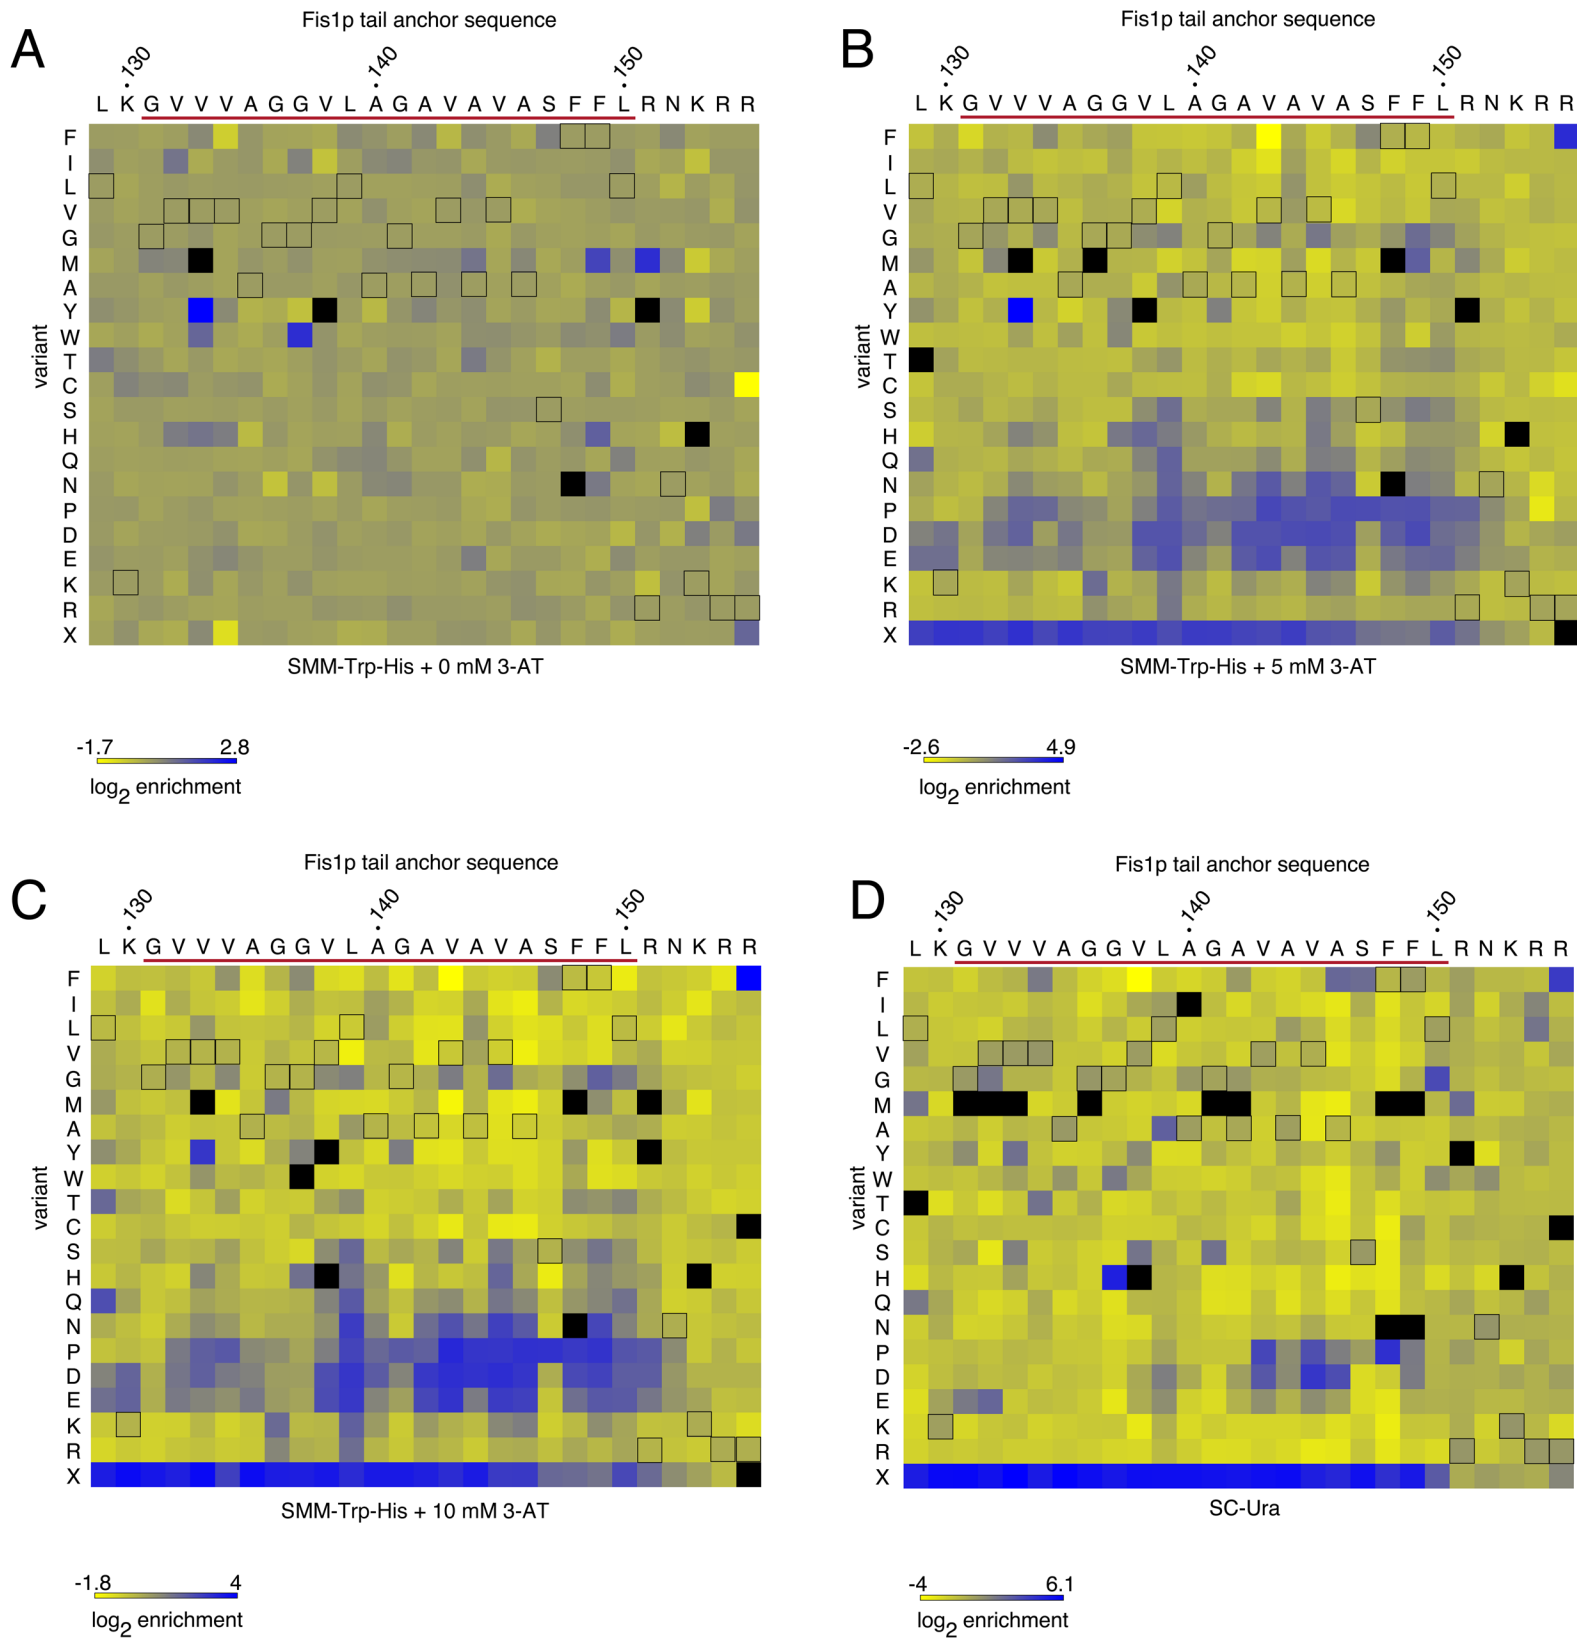

**Figure S3.** Amino acid replacement frequencies within the Fis1p TA under differing selective pressure. Quantification of replacement in SMM-Trp-His medium without 3-AT (A), containing 5 mM 3-AT (B), containing 10mM 3-AT (C), or in SC-Ura medium (D). In all panels, black outlines indicate the native amino acid at each position within the Fis1p TA. Amino acid replacements not detectable under selective conditions are denoted by black, filled squares. The predicted MAD is indicated by a red line.
