# Supplementary material
Source: PubMed Central journal article supplement (PMC5289845)
Supplement: 691FigureS4.pdf [file 691FigureS4.pdf]

Fis1p tail anchor sequence (codon)

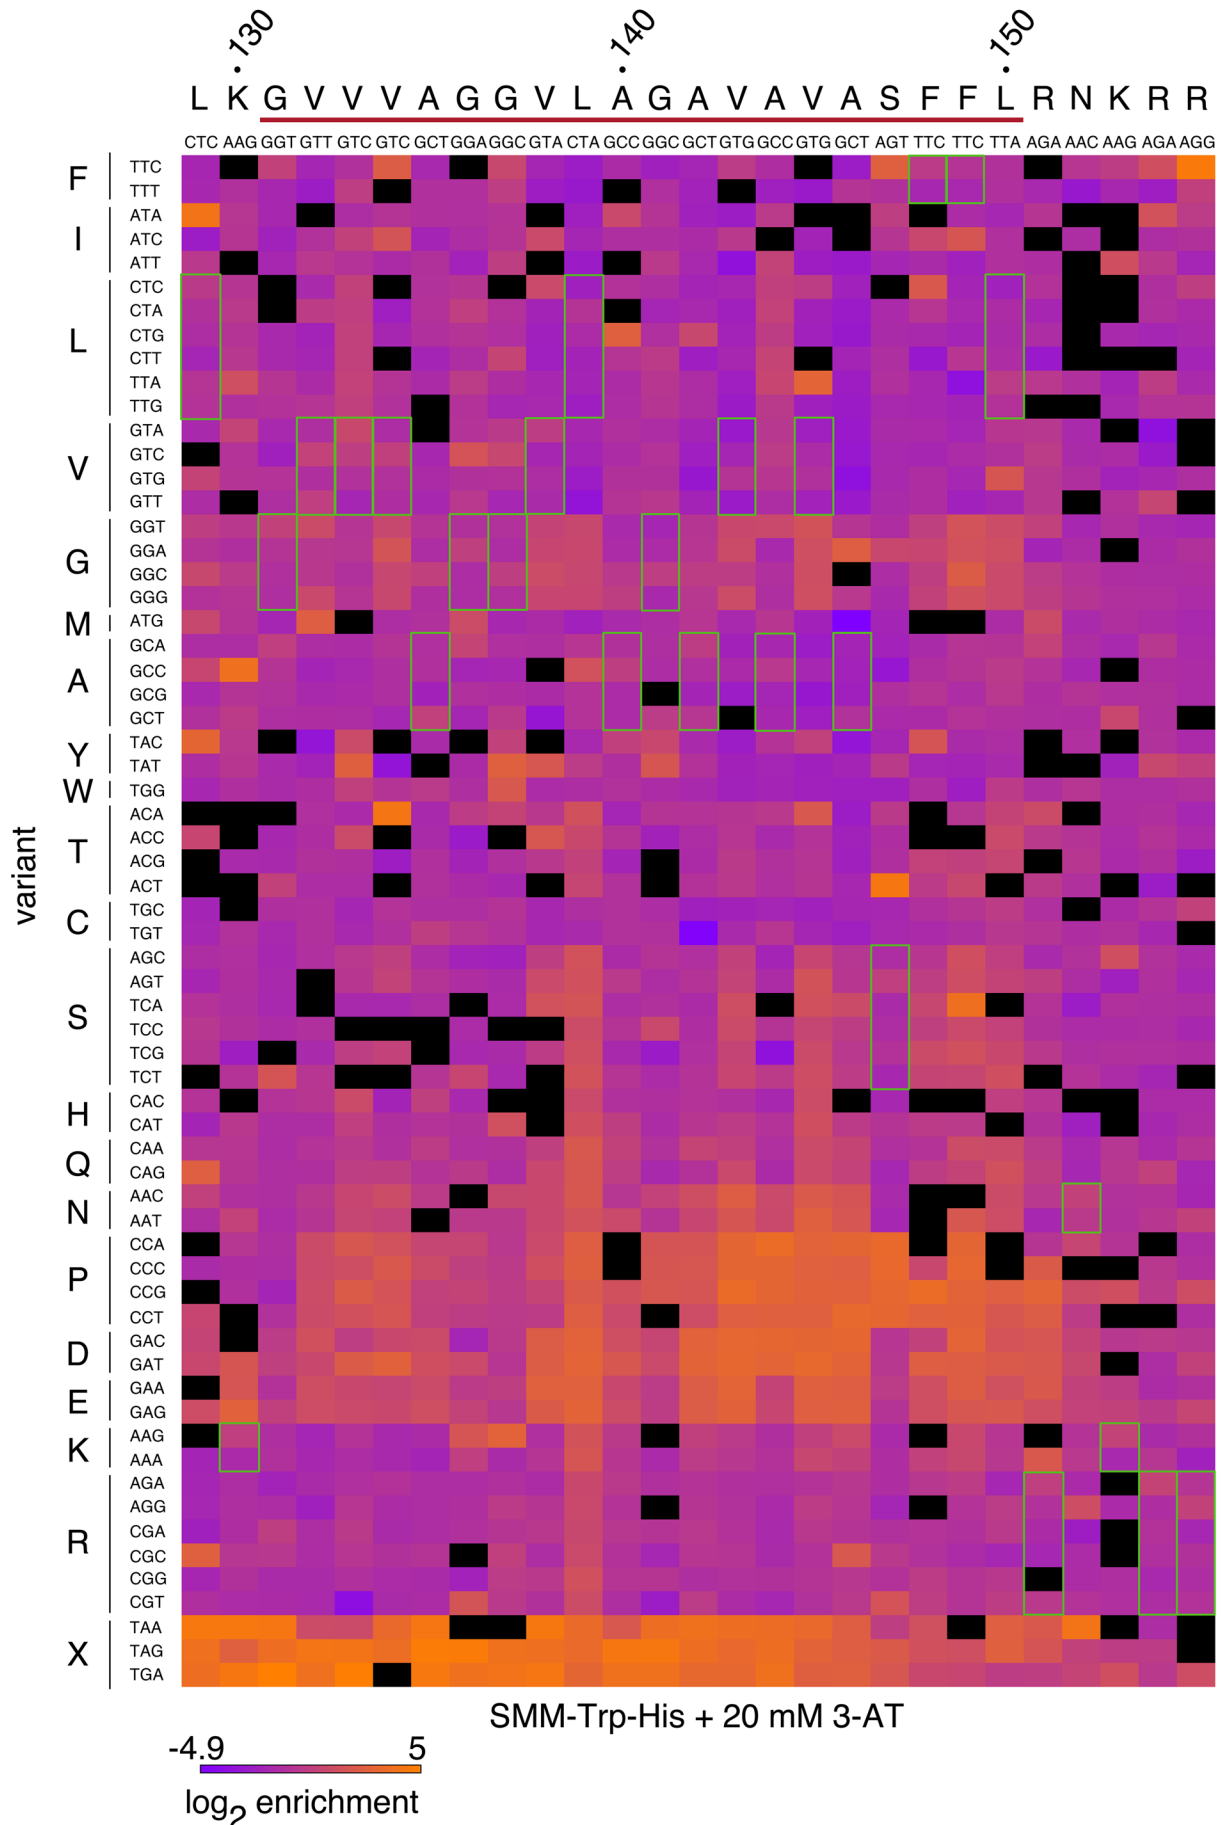

**Figure S4.** Little evidence exists for codon-level control of Gal4-sGFP-Fis1p TA targeting. The  $\log_2$  of enrichment values for each codon following selection of the Fis1p TA library in SMM-Trp-His medium containing 20 mM 3-AT are illustrated. Green outlines denote the native amino acid at each position. Codon replacements with no representation in the library following selection are represented by empty black squares. The predicted MAD is indicated by a red line.
