# Supplementary material
Source: PubMed Central journal article supplement (PMC5289845)
Supplement: 691FigureS6.pdf [file 691FigureS6.pdf]

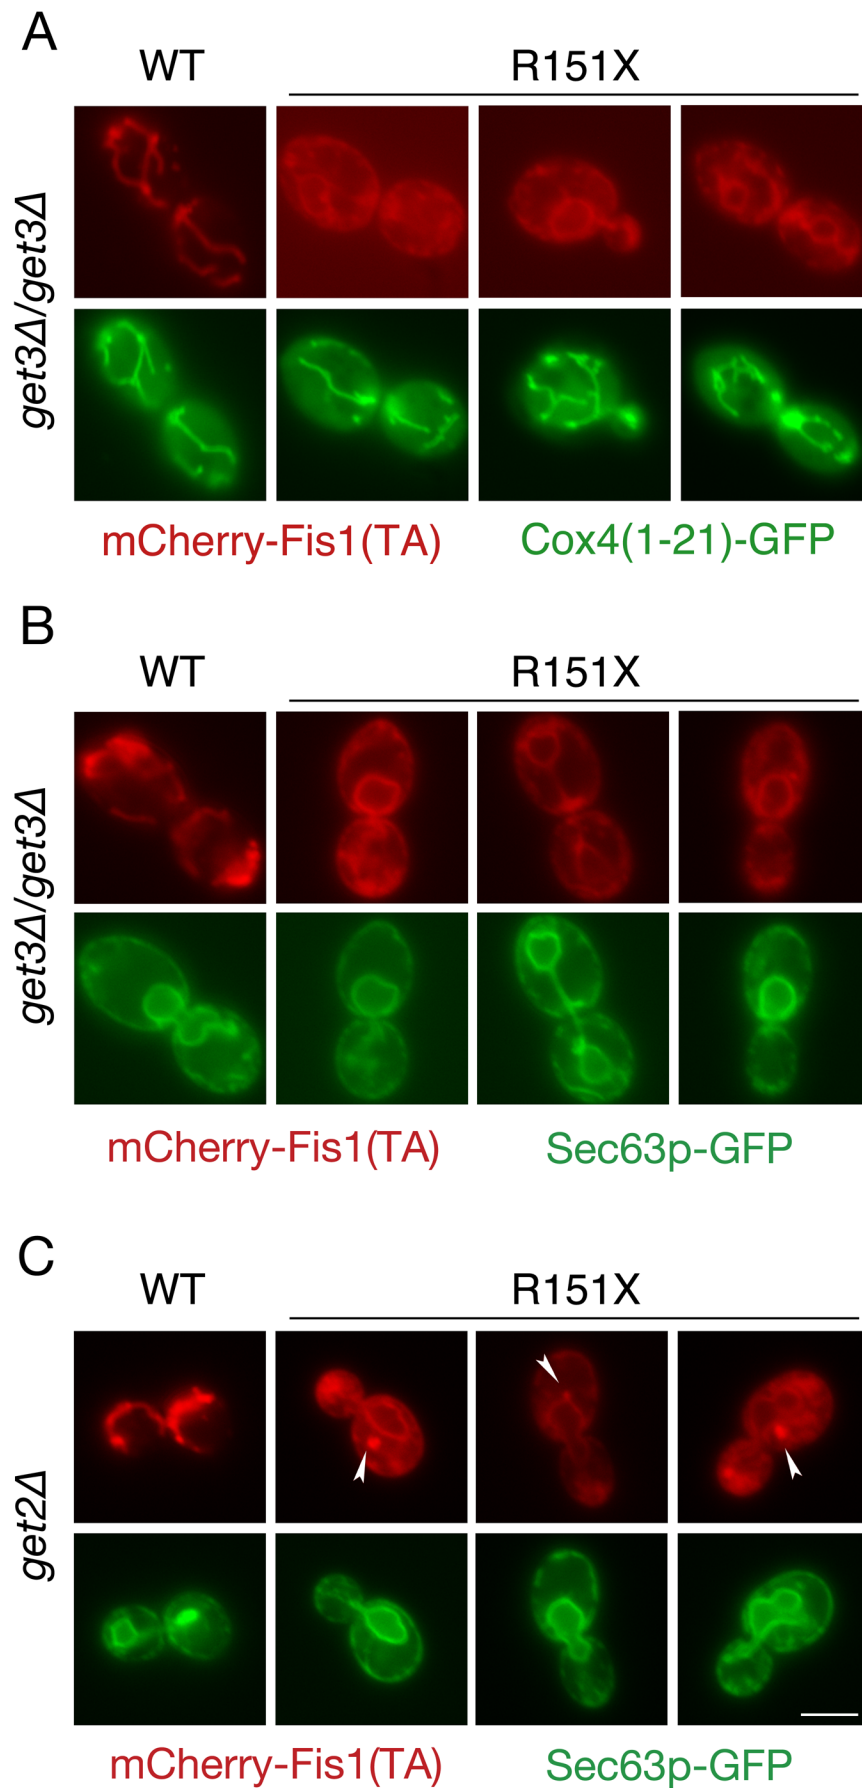

**Figure S6.** A mutated Fis1p TA lacking the positively charged carboxyl-terminus localizes to the ER independently of Get3p or Get2p. (A) Get3p is not required for ER localization of the R151X TA. *get3Δ/get3Δ* strain CDD1033 expressing mCherry fused to a WT Fis1p TA from plasmid b109 or expressing mCherry fused to a Fis1p TA lacking the positively charged carboxyl-terminus (R151X) from plasmid b254 were examined, and mitochondria were labelled with GFP expressed from pHS1. (B) *get3Δ/get3Δ* strain CDD1033 carrying plasmids b109 or b254 were examined by expression of Sec63p-GFP from plasmid pJK59 as in Figure 6C. (C) Get2p is not necessary for ER localization of the Fis1p TA lacking carboxyl-terminal, positively charged amino acids. *get2Δ* strain CDD948 was transformed with plasmid pJK59 and either b109 or b254, then imaged as in Figure 6C. White arrows indicate puncta containing truncated mCherry-Fis1(TA). Scale bar, 5  $\mu$ m.
