# Supplementary material
Source: PubMed Central journal article supplement (PMC5289845)
Supplement: 691FigureS8.pdf [file 691FigureS8.pdf]

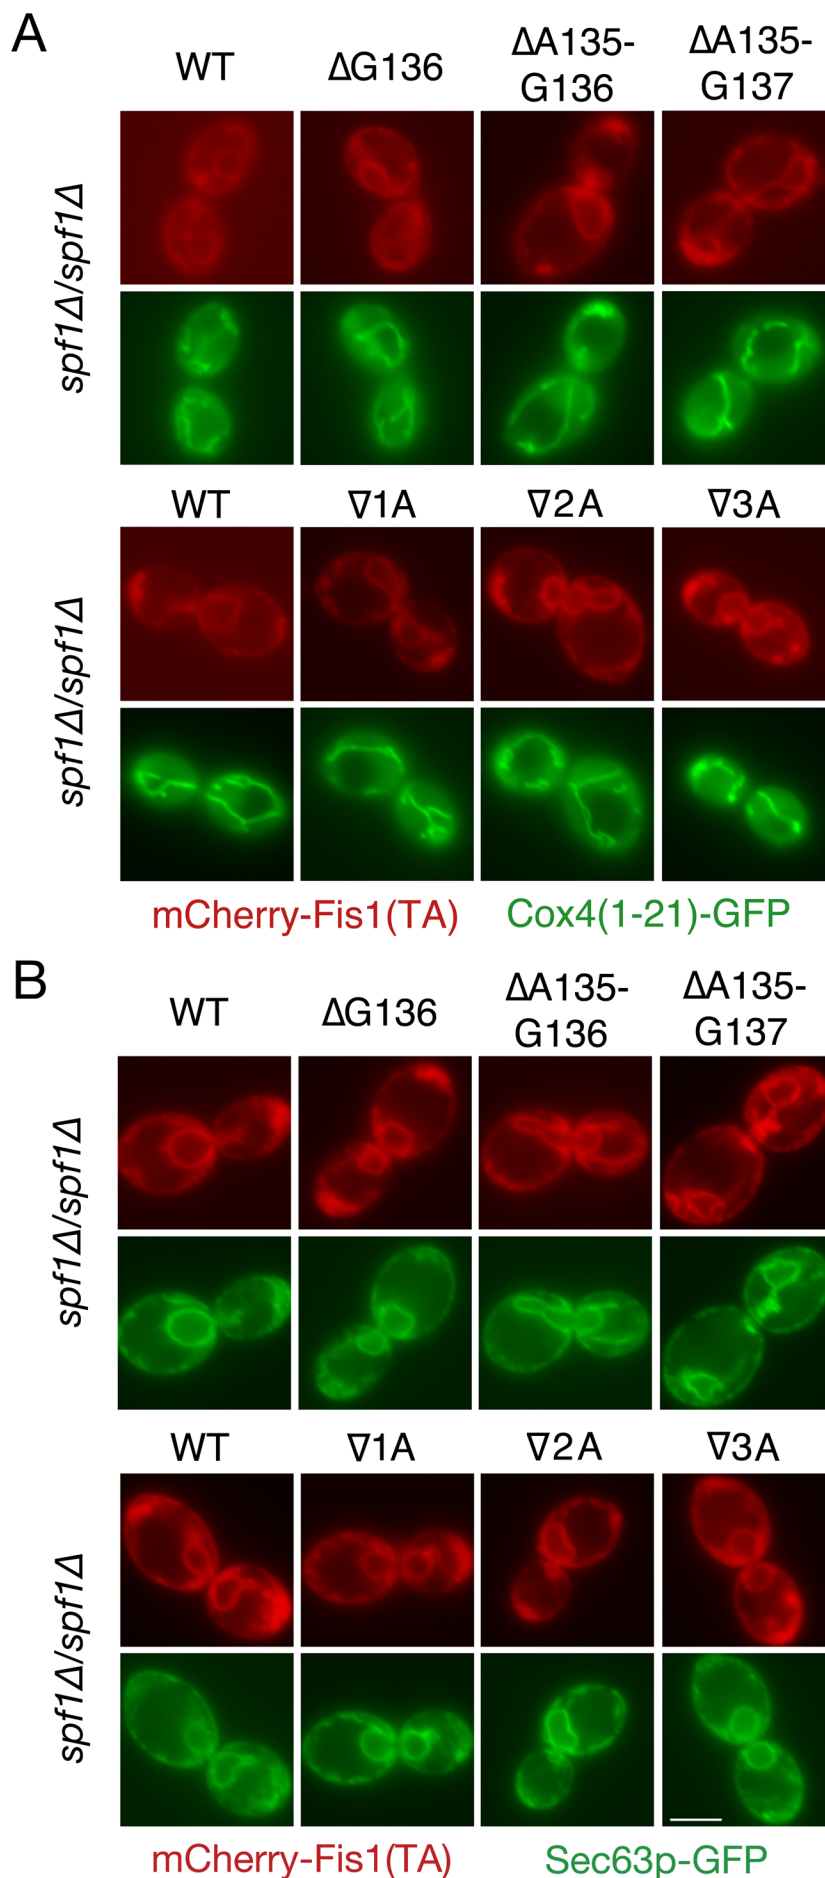

**Figure S8.** mCherry fused to Fis1p TAs of varying length remains targeted to the ER in cells lacking Spf1p. (A) Cells of *spf1* $\Delta$ /*spf1* $\Delta$  strain CDD1031 expressing mCherry-Fis1(TA) fusions from plasmids b109 (WT), b232 ( $\Delta$ G136), b233 ( $\Delta$ A135-G136), b234 ( $\Delta$ A135-G137), b235 ( $\nabla$ 1A), b236 ( $\nabla$ 2A), or b237 ( $\nabla$ 3A), were examined as in Figure 2B. (B) The same mCherry-linked TAs were analyzed in CDD1031 cells expressing Sec63p-GFP from pJK59. Scale bar, 5  $\mu$ m.
