# Supplementary material
Source: PubMed Central journal article supplement (PMC5289845)
Supplement: 691FigureS9.pdf [file 691FigureS9.pdf]

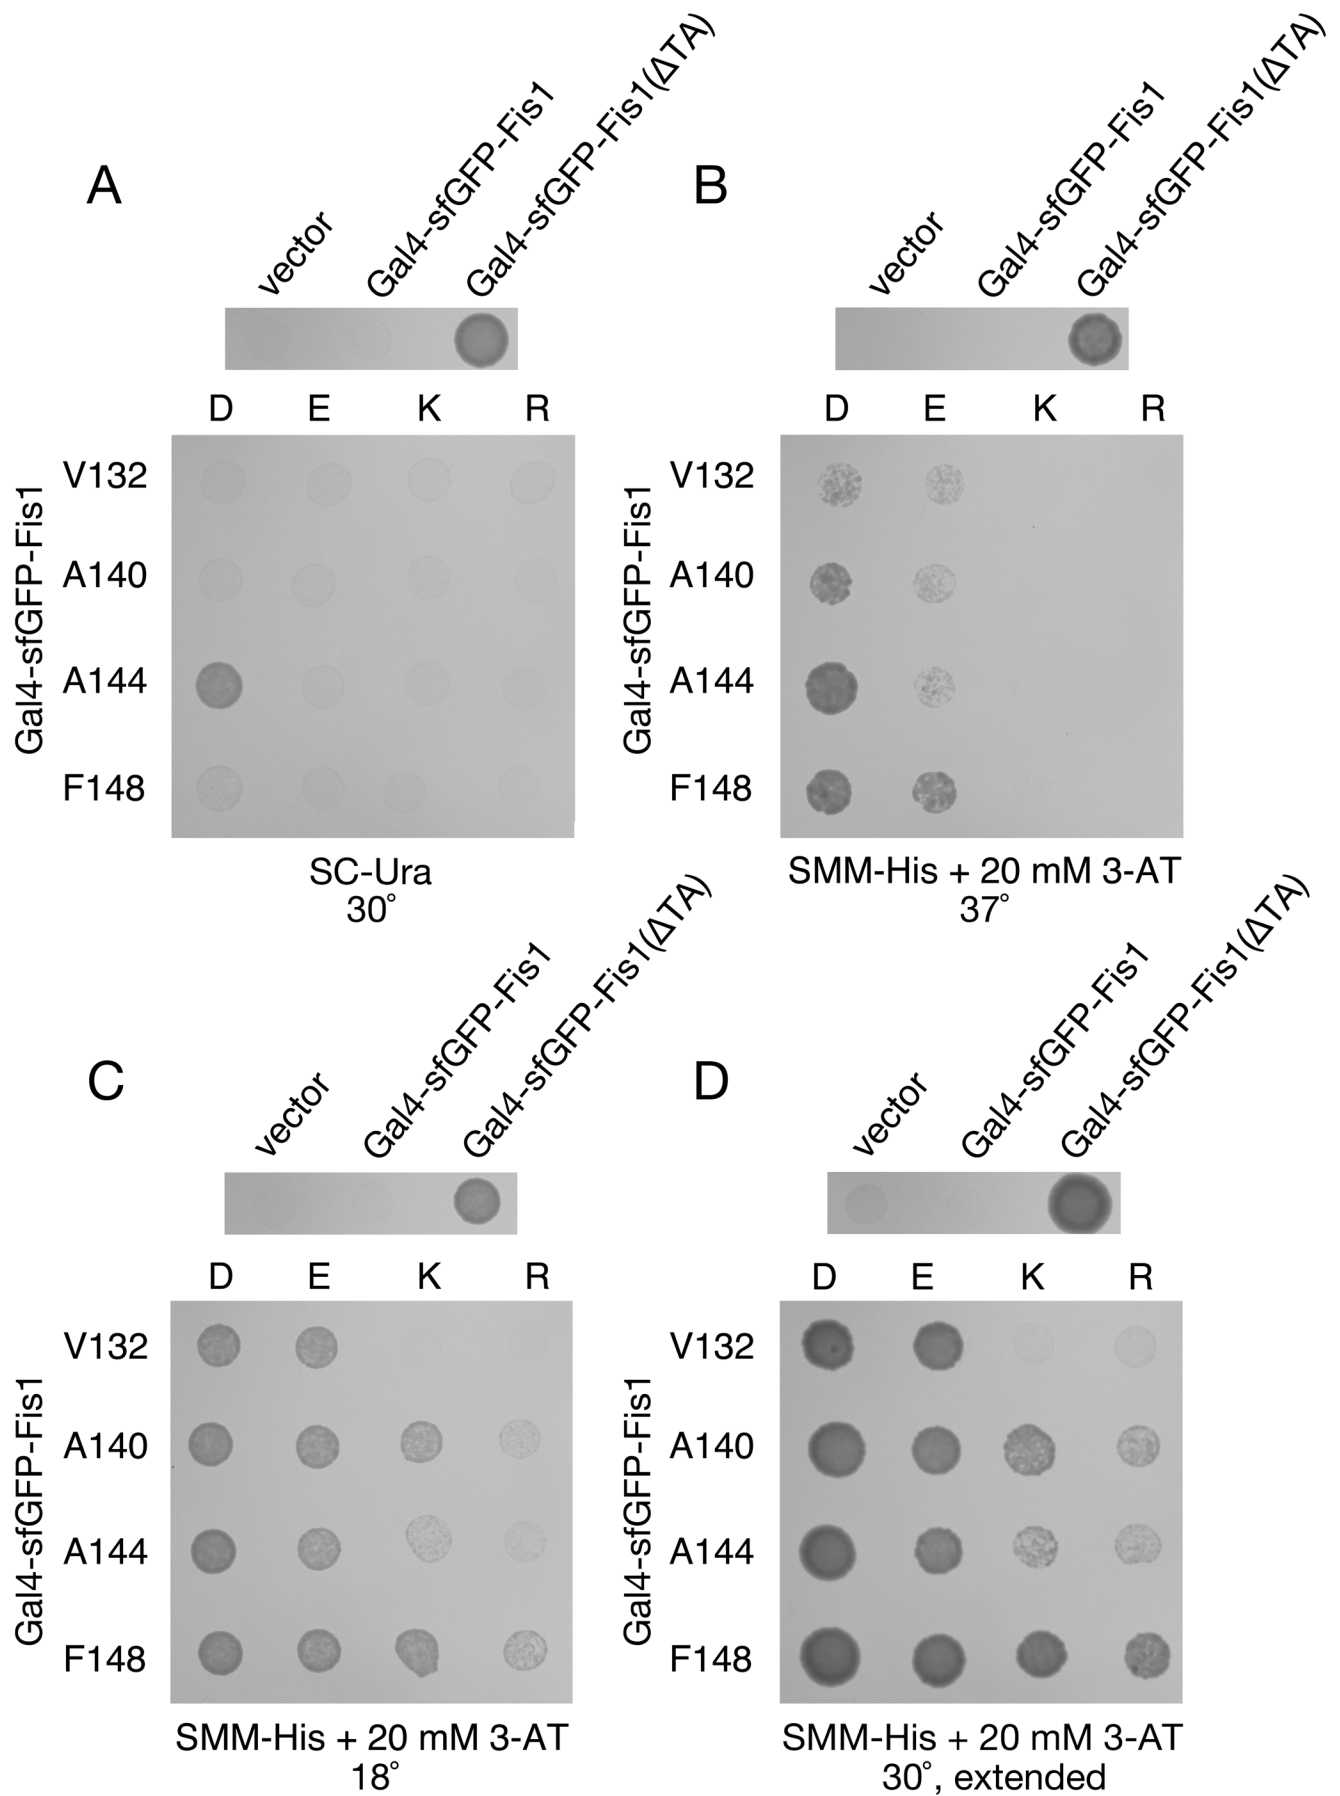

**Figure S9.** Temperature and selection-dependent proliferation in the presence of charges within the Fis1p MAD. (A) The A144D replacement within Gal4-sfGFP-Fis1p allows for strong Gal4-dependent proliferation under stringent selective conditions. Cells spotted in Figure 8A were also spotted to SC-Ura medium and incubated at 30° for 2 d. (B) Elevated temperature further distinguishes the behavior of cells expressing Gal4-sfGFP-Fis1p carrying positively charged or negatively charged amino acid replacements. Cells used in Figure 8A were also spotted to SMM-His + 20mM 3-AT and incubated at 37° for 4 d. (C) Cells were treated as in (B), with incubation at 18° for 4 d. (D) Extended incubation of the SMM-His + 20 mM 3-AT plate shown in Figure 8A for 4 d at 30°.
