# Supplementary material
Source: PubMed Central journal article supplement (PMC5289845)
Supplement: 691FigureS11.pdf [file 691FigureS11.pdf]

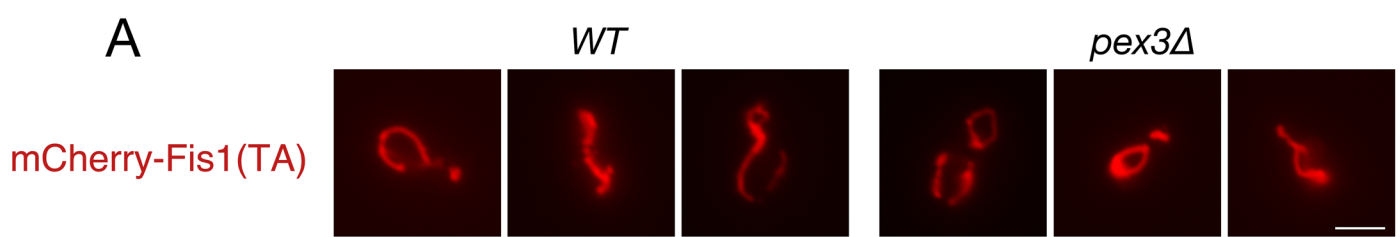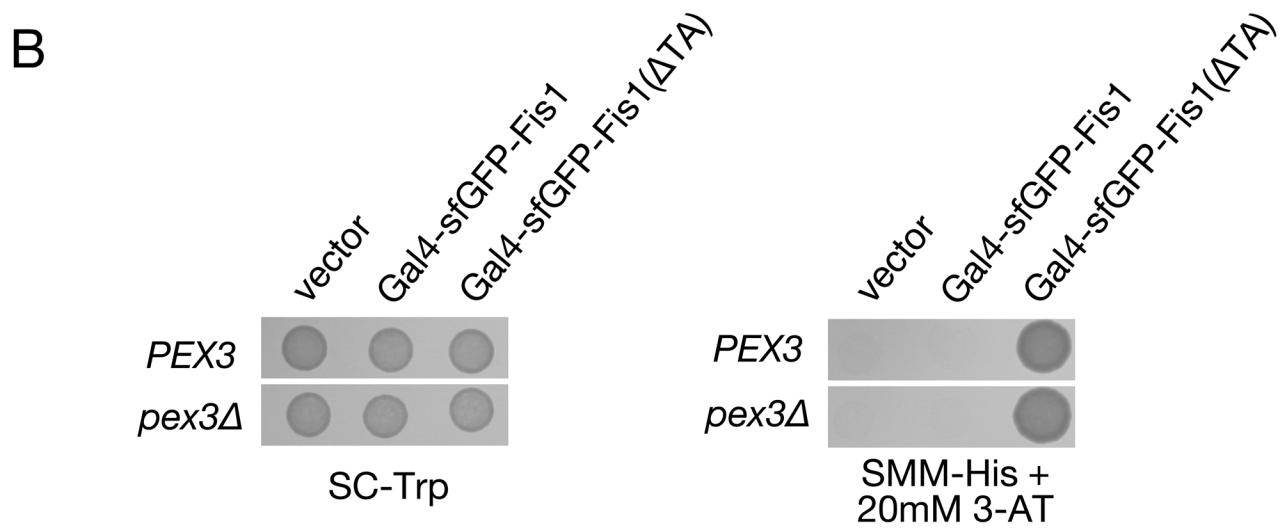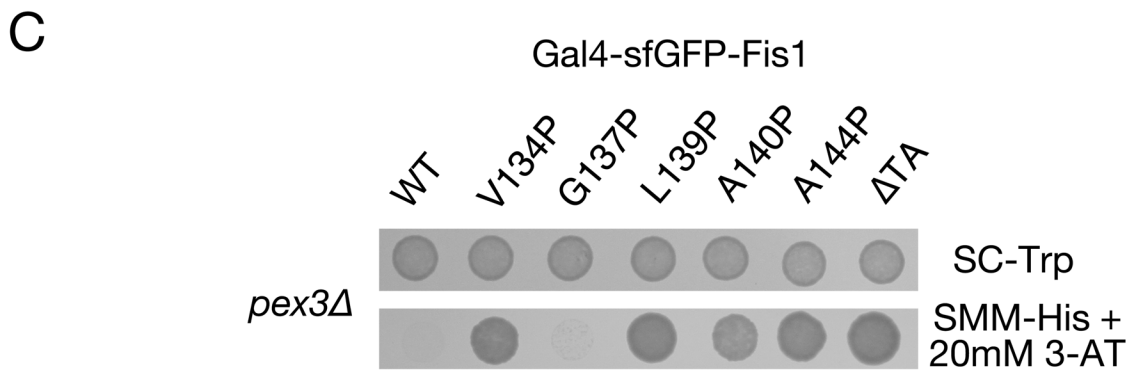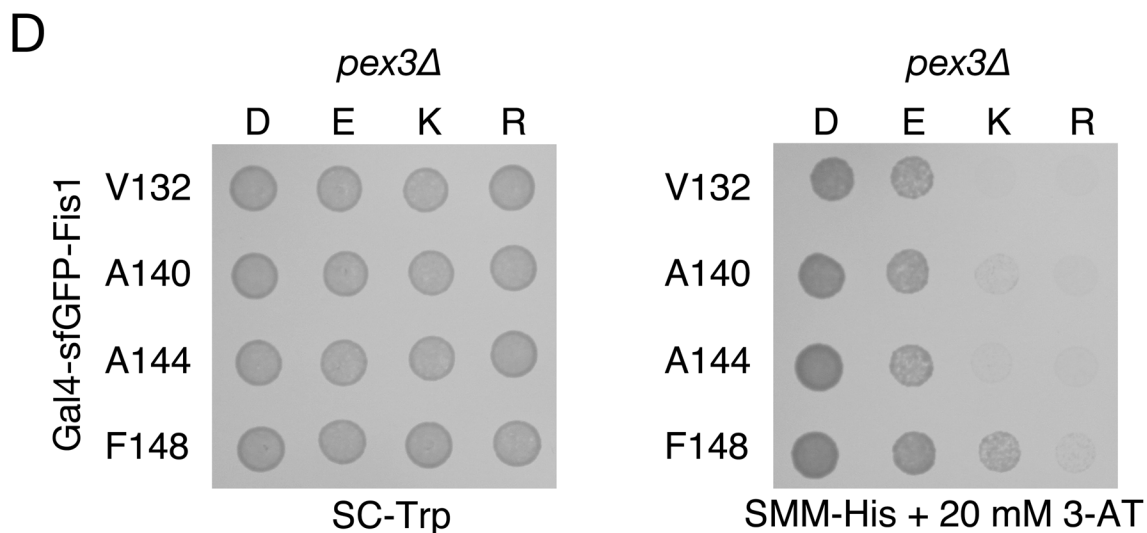

**Figure S11.** A block of peroxisomal membrane biogenesis does not lead to re-localization of the Fis1p TA to the cytosol or nucleus. (A) WT strain BY4742 and *pex3Δ* strain CDD974 were transformed with plasmid b109, expressing mCherry fused to a wild-type Fis1p TA, and imaged by fluorescence microscopy. Scale bar, 5  $\mu$ m. (B) Deletion of Pex3p does not lead to increased Gal4-sfGFP-Fis1p transcriptional activity. PEX3 strain MaV203 and isogenic *pex3Δ* strain CDD1172 were transformed with plasmids b100 (Gal4-sfGFP-Fis1), b101 [Gal4-sfGFP-Fis1( $\Delta$ TA)], or empty vector pKS1 and treated as in Figure 8A. (C) Relative activity of Gal4-sfGFP-Fis1p containing proline substitutions does not change upon Pex3p removal. Strain CDD1172 expressing Gal4-sfGFP-Fis1p variants from plasmids b100 (WT), b188 (V134P), b189 (G137P), b129 (L139P), b190 (A140P), b296 (A144P), or b101 ( $\Delta$ TA) was treated as in (B). (D) Relative differences in Gal4-sfGFP-Fis1p transcriptional activity among charge-substituted TAs do not change in the absence of Pex3p. Strain CDD1172 transformed with plasmids encoding the indicated mutations within the Fis1p TA (plasmids b173-b187 and b295) was treated as in (B).
